# Supplementary material for: Structure and Properties of Heterometallics Based on Lanthanides and Transition Metals with Methoxy-β-Diketonates
Source: Molecules. 2022 Dec 1;27(23):8400. doi: 10.3390/molecules27238400 (PMC9736739; doi:10.3390/molecules27238400)
Supplement: Supplementary file 1 [file molecules-27-08400-s001.zip › molecules-2012516-supplementary.pdf]

## Supplementary Materials to paper

### Structure and properties of heterometallics based on lanthanides and transition metals with methoxy- $\beta$ -diketonates

Vladislav V. Krisyuk<sup>1</sup>, Samara Urkasym kyzy<sup>1</sup>, Tatyana V. Rybalova<sup>2</sup>, Ilya V. Korolkov<sup>1</sup>, Mariya A. Grebenkina<sup>1,3</sup> and Alexander .N. Lavrov<sup>1\*</sup>

<sup>1</sup> Nikolaev Institute of Inorganic Chemistry, SB RAS, Lavrentiev Ave. 3, 630090 Novosibirsk, Russia; kvv@niic.nsc.ru (V.V.K.)

<sup>2</sup> Vorozhtsov Novosibirsk Institute of Organic Chemistry SB RAS, Lavrentiev Ave. 9, 630090 Novosibirsk, Russia

<sup>3</sup> Novosibirsk National Research State University, 1 Pirogova Str., 630090 Novosibirsk, Russia

\* Correspondence: lavrov@niic.nsc.ru (A.N.L.), kvv@niic.nsc.ru (V.V.K.)

#### Content

**Table S1:** XRD data for complexes **1,2,5,6,8,9**.

**Figure S1:** A view of the cell packing along Z axis in crystals of **2**.

**Figure S2:** XRD data for solid residue after sintering  $[(La(L^1)_2tmhd)_2Cu(tmhd)_2]$  in comparison with appropriate PDF files.

**Figure S3:** XRD data for solid residue after sintering  $[(La(L^1)_2tmhd)_2Co(tmhd)_2]$  in comparison with appropriate PDF files.

**Figure S4:** XRD data for solid residue after sintering  $[(La(L^1)_2tmhd)_2Ni(tmhd)_2]$  in comparison with appropriate PDF files.

**Figure S5:** XRD data for solid residue after sintering  $[(La(L^1)_2tmhd)_2Mn(tmhd)_2]$  in comparison with appropriate PDF files.

#### Results of magnetic measurements for the heterocomplexes

##### Gd-Cu complex (4)

**Figure S6:** (a) Temperature dependence of the magnetic susceptibility  $\chi$  measured for the Gd-Cu complex at the magnetic field  $H=1$  kOe. (b) Temperature dependences of  $\mu_{eff}$  and  $1/\chi p$ . The depicted effective moment  $\mu_{eff}$  is calculated for the case of non-interacting magnetic moments ( $\theta = 0$ ).

##### Pr-Cu complex (2)

**Figure S7:** (a) Temperature dependence of the magnetic susceptibility  $\chi$  measured for the Pr-Cu complex at the magnetic fields  $H = 1; 10$  kOe. (b) Temperature dependences of  $\mu_{eff}$  and  $1/\chi p$ . The depicted effective moment  $\mu_{eff}$  is calculated for the case of non-interacting magnetic moments ( $\theta = 0$ ).

##### Sm-Cu complex (3)

**Figure S8:** (a) Temperature dependence of the magnetic susceptibility  $\chi$  measured for the Sm-Cu complex at the magnetic fields  $H = 1; 10$  kOe. (b) Temperature dependences of  $\mu_{eff}$  and  $1/\chi p$ . The depicted effective moment  $\mu_{eff}$  is calculated for the case of non-interacting magnetic moments ( $\theta = 0$ ).

##### La-Co complex (5)

**Figure S9:** (a) Temperature dependence of the magnetic susceptibility  $\chi$  measured for the La-Co complex at the magnetic fields  $H = 1; 10$  kOe. (b) Temperature dependences of  $\mu_{eff}$  and  $1/\chi p$ . The depicted effective moment  $\mu_{eff}$  is calculated for the case of non-interacting magnetic moments ( $\theta = 0$ ). (c) Magnetic field dependence of the magnetization measured at  $T = 1.77$  K.

##### La-Ni complex (6)

**Figure S10:** (a) Temperature dependence of the magnetic susceptibility  $\chi$  measured for the La-Ni complex at the magnetic fields  $H = 1; 10$  kOe. (b) Temperature dependences of  $\mu_{eff}$  and  $1/\chi p$ . The depicted effective moment  $\mu_{eff}$  is calculated for the case of non-interacting magnetic moments ( $\theta = 0$ ).

**Table S1:** XRD data for complexes **1,2,5,6,8,9**.

| Compound                             | <b>1</b>                                                                           | <b>2</b>                                                                           | <b>5</b>                                                                           | <b>6</b>                                                                           | <b>8</b>                                                                           | <b>9</b>                                                                        |
|--------------------------------------|------------------------------------------------------------------------------------|------------------------------------------------------------------------------------|------------------------------------------------------------------------------------|------------------------------------------------------------------------------------|------------------------------------------------------------------------------------|---------------------------------------------------------------------------------|
| Empirical formula                    | C <sub>72</sub> H <sub>108</sub> F <sub>12</sub> O <sub>24</sub> CuLa <sub>2</sub> | C <sub>72</sub> H <sub>108</sub> F <sub>12</sub> O <sub>24</sub> CuPr <sub>2</sub> | C <sub>72</sub> H <sub>108</sub> CoF <sub>12</sub> La <sub>2</sub> O <sub>24</sub> | C <sub>72</sub> H <sub>108</sub> F <sub>12</sub> La <sub>2</sub> NiO <sub>24</sub> | C <sub>76</sub> H <sub>116</sub> CuF <sub>12</sub> La <sub>2</sub> O <sub>24</sub> | C <sub>48</sub> H <sub>60</sub> F <sub>18</sub> La <sub>2</sub> O <sub>18</sub> |
| Formula weight                       | 1926.94                                                                            | 1930.95                                                                            | 1922.33                                                                            | 1922.11                                                                            | 1983.04                                                                            | 1544.78                                                                         |
|                                      | 200(2) K                                                                           | 200(2) K                                                                           | 150(2) K                                                                           | 150(2) K                                                                           | 150(2) K                                                                           | 110(2) K                                                                        |
| Wavelength Å                         | 0.71073                                                                            | 0.71073                                                                            | 0.71073                                                                            | 0.71073                                                                            | 0.71073                                                                            | 0.71073                                                                         |
| Crystal system                       | Monoclinic                                                                         | Monoclinic                                                                         | Monoclinic                                                                         | Monoclinic                                                                         | Monoclinic                                                                         | Monoclinic                                                                      |
| Space group                          | P2(1)/n                                                                            | P2(1)/n                                                                            | <i>P2<sub>1</sub>/n</i>                                                            | <i>P2<sub>1</sub>/n</i>                                                            | <i>P2<sub>1</sub>/n</i>                                                            | <i>P2<sub>1</sub>/c</i>                                                         |
| Unit cell dimensions <i>a</i> , Å    | 13.0379(8)                                                                         | 13.0009(6)                                                                         | 13.0328(4)                                                                         | 13.0158 (7)                                                                        | 12.8652(5)                                                                         | 18.2778(4)                                                                      |
| <i>b</i> , Å                         | 21.985(1)                                                                          | 21.9732(1)                                                                         | 21.964(1)                                                                          | 21.993(2)                                                                          | 22.5354(9)                                                                         | 19.9517(3)                                                                      |
| <i>c</i> , Å                         | 15.0964(8)                                                                         | 15.0612(6)                                                                         | 14.6846(6)                                                                         | 14.5878(8)                                                                         | 15.2704(6)                                                                         | 16.7143(3)                                                                      |
| $\alpha$ , °                         | 90                                                                                 | 90                                                                                 | 90                                                                                 | 90                                                                                 | 90                                                                                 | 90                                                                              |
| $\beta$ , °                          | 97.289(2)                                                                          | 97.354(2)                                                                          | 96.803 (1)                                                                         | 96.719 (2)                                                                         | 95.940 (2)                                                                         | 97.888 (1)                                                                      |
| $\gamma$ , °                         | 90                                                                                 | 90                                                                                 | 90                                                                                 | 90                                                                                 | 90                                                                                 | 90                                                                              |
| Volume, Å <sup>3</sup>               | 4292.1(4)                                                                          | 4267.2(3)                                                                          | 4173.8 (3)                                                                         | 4147.2 (4)                                                                         | 4403.5 (3)                                                                         | 6037.58 (19)                                                                    |
| Z                                    | 2                                                                                  | 2                                                                                  | 2                                                                                  | 2                                                                                  | 2                                                                                  | 4                                                                               |
| Density (calcd.), Mg.m <sup>-3</sup> | 1.491                                                                              | 1.503                                                                              | 1.530                                                                              | 1.539                                                                              | 1.496                                                                              | 1.699                                                                           |
| Abs. coefficient, mm <sup>-1</sup>   | 1.317                                                                              | 1.466                                                                              | 1.30                                                                               | 1.33                                                                               | 1.29                                                                               | 1.52                                                                            |
| F(000)                               | 1966                                                                               | 1974                                                                               | 1962                                                                               | 1964                                                                               | 2030                                                                               | 3072                                                                            |
| Crystal size, mm <sup>3</sup>        | 0.32 × 0.08 × 0.03                                                                 | 0.57 × 0.11 × 0.05                                                                 | 0.25 × 0.08 × 0.04                                                                 | 0.26 × 0.22 × 0.05                                                                 | 0.12 × 0.1 × 0.09                                                                  | 0.29 × 0.16 × 0.14                                                              |
| Θ range for data collection, °       | 2.7 – 29.4                                                                         | 2.3 – 34.4                                                                         | 2.3 - 25.8                                                                         | 1.8 - 27.1                                                                         | 2.2 - 31.6                                                                         | 1.5 - 29.6                                                                      |
| Index ranges                         | -18 ≤ <i>h</i> ≤ 18,<br>-30 ≤ <i>k</i> ≤ 30,<br>-20 ≤ <i>l</i> ≤ 20                | -20 ≤ <i>h</i> ≤ 20,<br>-34 ≤ <i>k</i> ≤ 34,<br>-23 ≤ <i>l</i> ≤ 22                | -11 ≤ <i>h</i> ≤ 15,<br>-17 ≤ <i>k</i> ≤ 26,<br>-17 ≤ <i>l</i> ≤ 17                | -16 ≤ <i>h</i> ≤ 12,<br>-26 ≤ <i>k</i> ≤ 28,<br>-18 ≤ <i>l</i> ≤ 18                | -18 ≤ <i>h</i> ≤ 18,<br>-33 ≤ <i>k</i> ≤ 33,<br>-22 ≤ <i>l</i> ≤ 22                | -22 ≤ <i>h</i> ≤ 25,<br>-24 ≤ <i>k</i> ≤ 27,<br>-23 ≤ <i>l</i> ≤ 20             |

|                                                   |                               |                               |                               |                               |                               |                               |
|---------------------------------------------------|-------------------------------|-------------------------------|-------------------------------|-------------------------------|-------------------------------|-------------------------------|
| Reflections collected                             | 94240                         | 115128                        | 20278                         | 34638                         | 209635                        | 49738                         |
| Independent reflections                           | 11842 [R(int) 0.049]          | 17896 [R(int) 0.047]          | 7937 [R(int) 0.028]           | 9149 [R(int) 0.159]           | 14670 [R(int) 0.057]          | 16948 [R(int) 0.044]          |
| Reflections $I > 2\sigma(I)$                      | 9599                          | 14502                         | 6584                          | 6009                          | 12323                         | 12912                         |
| Completeness to $\theta$ %                        | 99.7, $\theta = 25.25^\circ$  | 99.9, $\theta = 25.25^\circ$  | 99.5, $\theta = 25.25^\circ$  | 100, $\theta = 25.25^\circ$   | 99.9, $\theta = 25.25^\circ$  | 99.8, $\theta = 25.25^\circ$  |
| parameters / restraints                           | 572/ 30                       | 584/ 23                       | 547 / 24                      | 518 / 0                       | 620 /79                       | 834 / 6                       |
| Max. and min. transmission                        | 0.678, 0.962                  | 0.489, 0.930                  | 0.615, 0.745                  | 0.651, 0.746                  | 0.679, 0.746                  | 0.664, 0.746                  |
| Refinement method                                 | Full matrix LSM against $F^2$ |
| Goodness-of-fit on $L4$                           | 1.068                         | 1.294                         | 1.02                          | 0.98                          | 1.07                          | 1.01                          |
| Final R indices $I > 2\sigma(I)$ : $R_1$ , $wR_2$ | 0.0333, 0.0857                | 0.0491, 0.1249                | 0.038, 0.1069                 | 0.039, 0.085                  | 0.046, 0.113                  | 0.035, 0.064                  |
| Final R indices (all data): $R_1$ , $wR_2$        | 0.0511, 0.1003                | 0.0696, 0.1368                | 0.0511, 0.115                 | 0.1016, 0.097                 | 0.057, 0.120                  | 0.056, 0.072                  |
| Largest diff. peak / hole, $e.\text{\AA}^{-3}$    | 1.03 / -0.87                  | 2.29 / -1.02                  | 0.83, -0.68                   | 1.31, -1.54                   | 1.60, -1.33                   | 0.68, -0.69                   |
| *CCDC deposition numbers                          | 1534092                       | 1534091                       | 2175224                       | 2175225                       | 2175226                       | 2175227                       |

\* Cif-files can be obtained free of charge from The Cambridge Crystallographic Data Centre via [www.ccdc.cam.ac.uk/data\\_request/cif](http://www.ccdc.cam.ac.uk/data_request/cif)

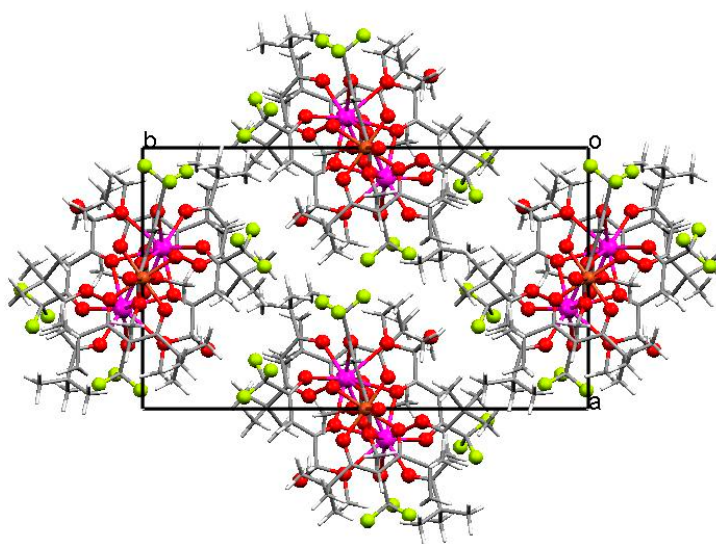

**Figure S1:** A view of the cell packing along Z axis in crystals of **2**.

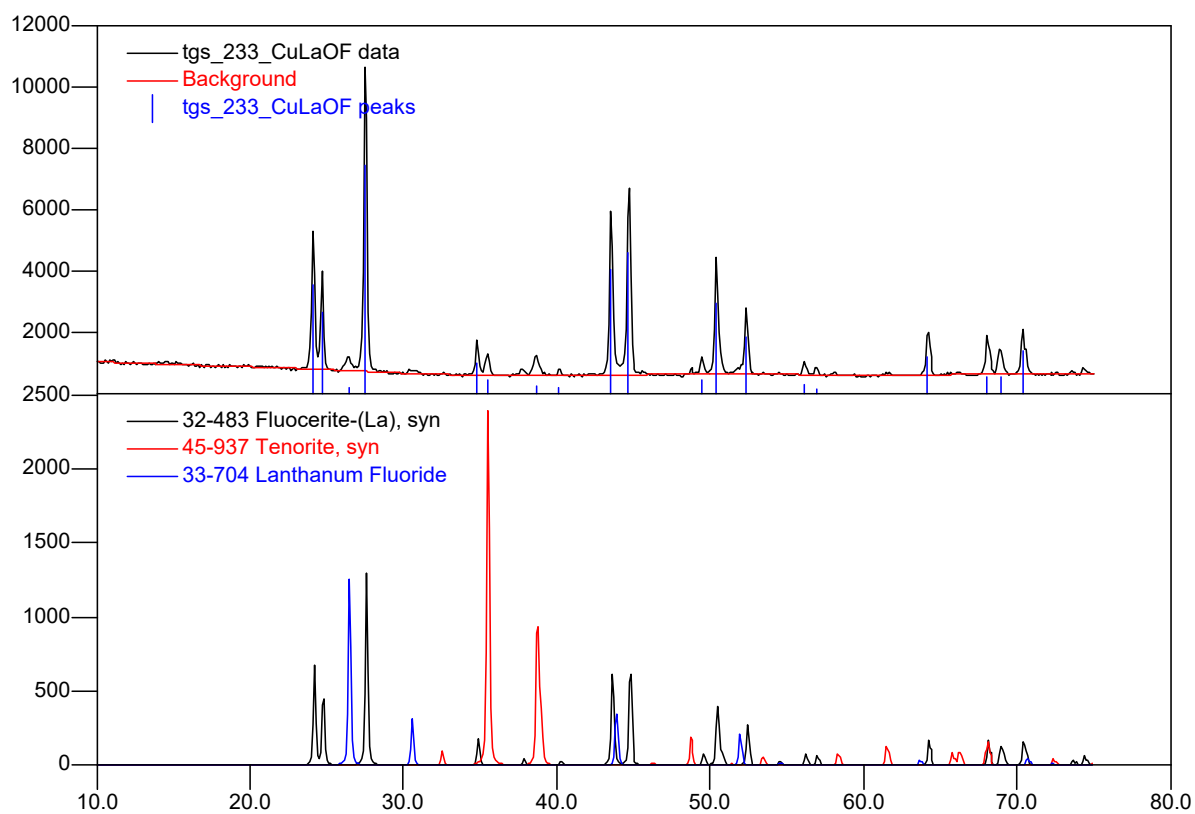

**Figure S2:** XRD data for solid residue after sintering  $[(\text{La}(\text{L}^1)_2\text{tmhd})_2\text{Cu}(\text{tmhd})_2]$  in comparison with appropriate PDF files.

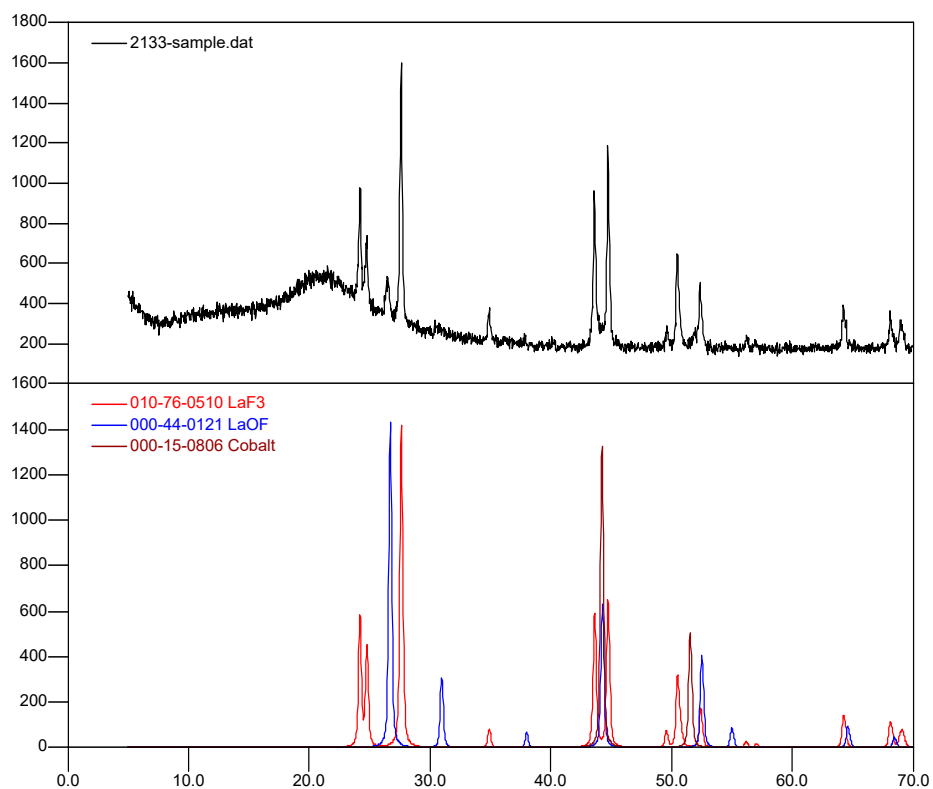

**Figure S3:** XRD data for solid residue after sintering  $[(\text{La}(\text{L}^1)_2\text{tmhd})_2\text{Co}(\text{tmhd})_2]$  in comparison with appropriate PDF files

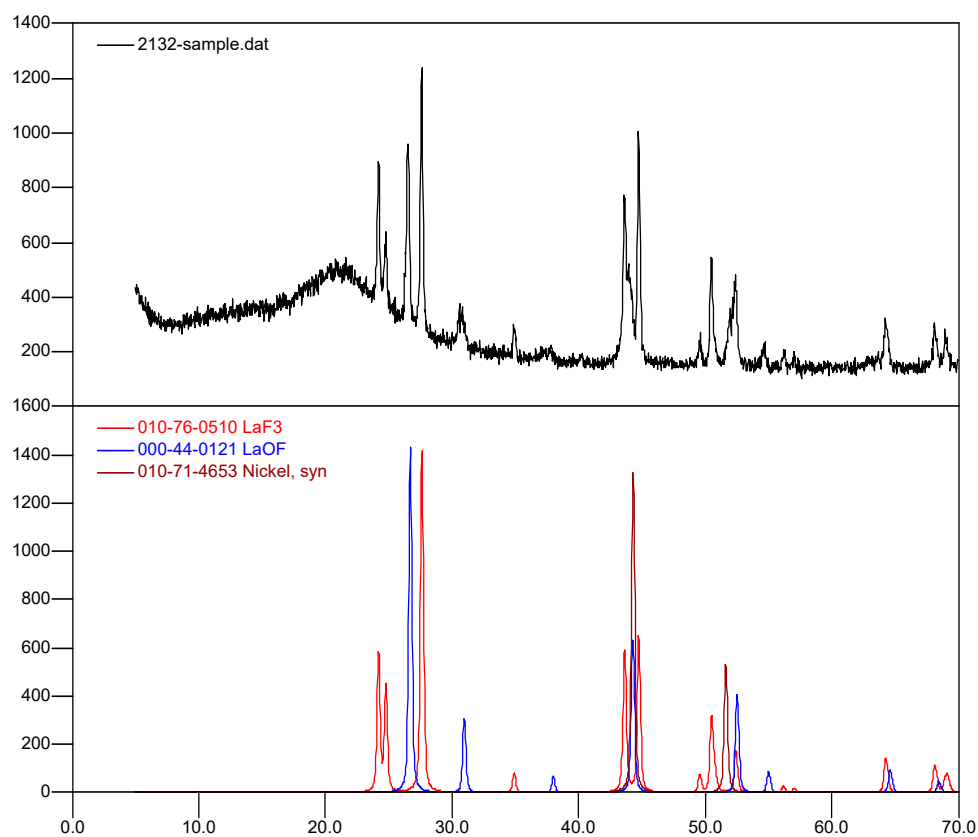

**Figure S4:** XRD data for solid residue after sintering  $[(\text{La}(\text{L}^1)_2\text{tmhd})_2\text{Ni}(\text{tmhd})_2]$  in comparison with appropriate PDF files.

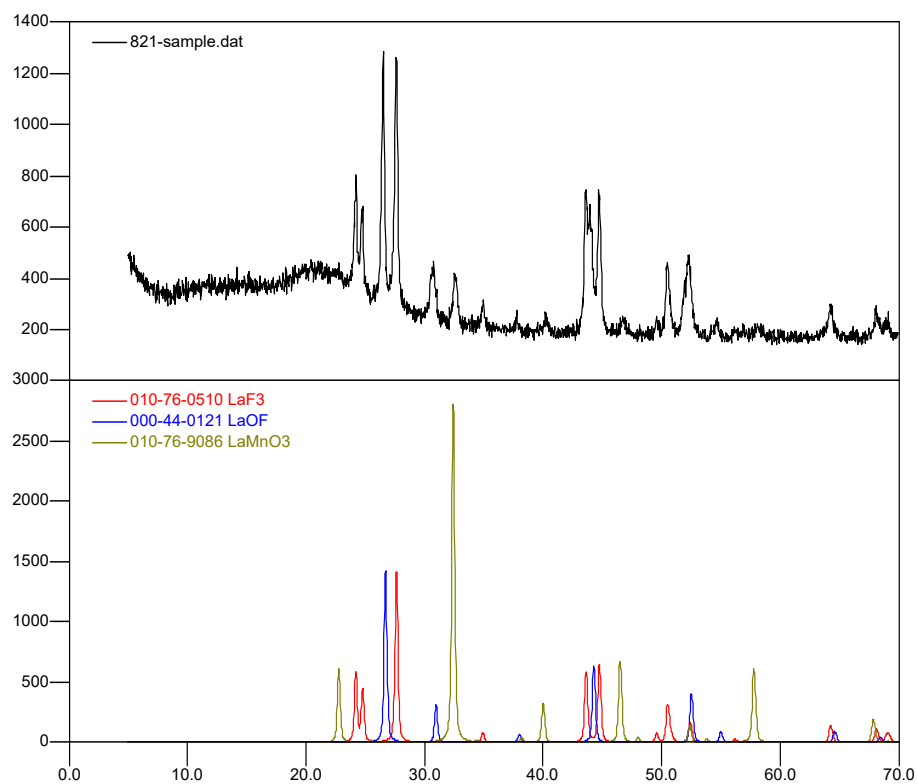

**Figure S5:** XRD data for solid residue after sintering  $[(\text{La}(\text{L}^1)_2\text{tmhd})_2\text{Mn}(\text{tmhd})_2]$  in comparison with appropriate PDF files.

## Results of magnetic measurements for the heterocomplexes

### Gd-Cu complex (4)

The Gd-Cu complex is found to exhibit paramagnetic behavior throughout the available temperature range without any magnetic phase transition (Figure S6a). The paramagnetic behavior can be well described by the Curie-Weiss dependence  $\chi_p(T) = N_A \mu_{\text{eff}}^2 / 3k_B(T - \theta)$  with a nearly zero Weiss constant  $\theta \approx -0.4$  K (Figure S6b). At high temperatures, the measured effective magnetic moment  $\mu_{\text{eff}} \sim 11.47 \mu_B$  corresponds very well to the values expected for two gadolinium ions  $\text{Gd}^{3+}$ ,  $\mu_{\text{eff}}(\text{Gd}) \approx 7.94 \mu_B$ , and one copper ion  $\text{Cu}^{2+}$ ,  $\mu_{\text{eff}}(\text{Cu}) \approx 2 \mu_B$ :  $\mu_{\text{eff}} \approx \sqrt{2 \cdot 7.94^2 + 2^2} \approx 11.41 \mu_B$ . In the low-temperature region, the  $1/\chi_p(T)$  dependence deviates from linearity and the calculated effective magnetic moment decreases slightly both due to the nonlinearity of the magnetization curve expected for  $\text{Gd}^{3+}$  ions ( $S = 7/2$ ) in the region of fields  $g\mu_B SH \sim k_B T$  and a very weak inter-ion exchange or dipole-dipole interactions. Thus, the studied compound can be considered as a set of virtually non-interacting gadolinium  $\text{Gd}^{3+}$  ions ( $S = 7/2$ ) and  $\text{Cu}^{2+}$  ions ( $S = 1/2$ ).

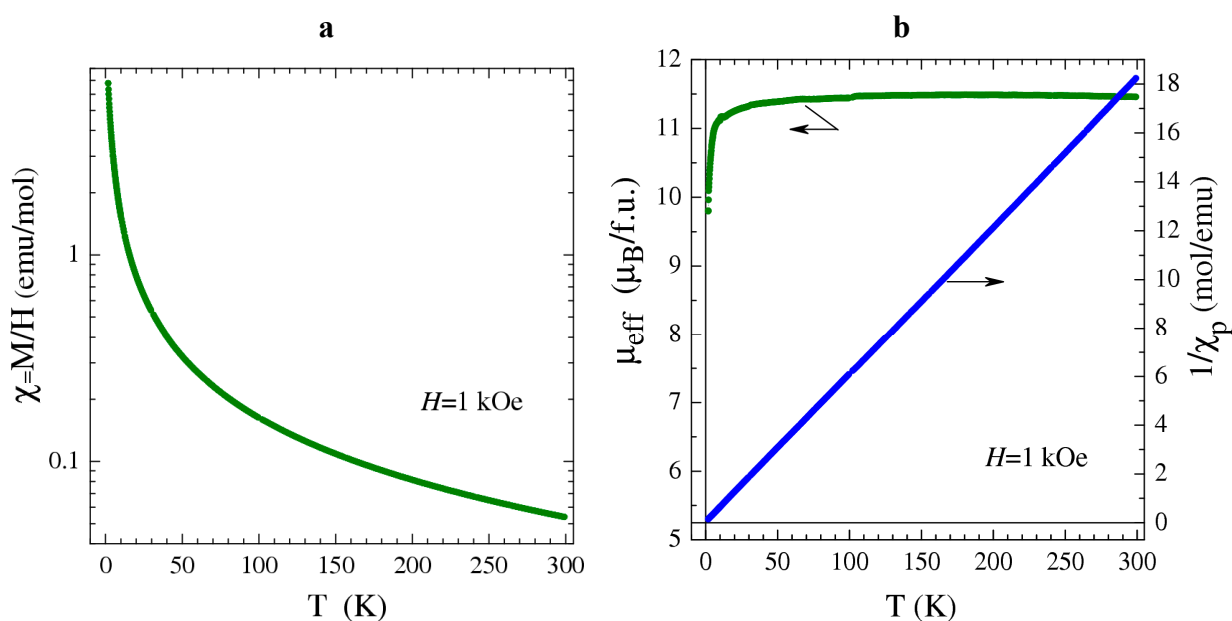

**Figure S6:** (a) Temperature dependence of the magnetic susceptibility  $\chi$  measured for the Gd-Cu complex at the magnetic field  $H=1$  kOe. (b) Temperature dependences of  $\mu_{\text{eff}}$  and  $1/\chi_p$ . The depicted effective moment  $\mu_{\text{eff}}$  is calculated for the case of non-interacting magnetic moments ( $\theta = 0$ ).

### Pr-Cu complex (2)

The Pr-Cu complex exhibits paramagnetic behavior throughout the available temperature range with a low-temperature peculiarity that at a first glance looks like a manifestation of inter-ion interactions (Figure S7a); on the  $\chi(T)$  plot, it seems that the susceptibility begins to grow faster at  $T < 7-8$  K. However, in fact it is the low-temperature region where the susceptibility behavior matches the Curie-Weiss dependence with the Weiss constant  $\theta$  close to zero (Figure S7b), while at higher temperatures the susceptibility behavior is determined by the changes in effective moment  $\mu_{\text{eff}}$ . In the highest temperature region of 200-300 K, the  $\chi_p(T)$  data can be described by the Curie-Weiss dependence with an effective magnetic moment  $\mu_{\text{eff}} \approx 5.38 \mu_B$  (Figure S2b), which agrees well with the value expected for two  $\text{Pr}^{3+}$  ions ( $S = 1$ ,  $L = 5$ ,  $J = 4$ ) and one  $\text{Cu}^{2+}$  ion ( $S = 1/2$ ,  $g = 2.1$ ):  $\mu_{\text{eff}} \approx \sqrt{2 \cdot 3.58^2 + 1.82^2} \approx 5.38 \mu_B$ . On cooling, the effective magnetic moment decreases down to  $\mu_{\text{eff}} \approx 2.07 \mu_B$  at  $T = 1.77$  K. This decrease corresponds in magnitude to the complete disappearance of the contribution from the praseodymium ions while the contribution from  $\text{Cu}^{2+}$  ions is kept intact. Since the disappearance of the magnetic contribution of  $\text{Pr}^{3+}$  ions as a result of their antiferromagnetic (AFM) interaction requires unrealistically strong exchange interactions, the most likely explanation is the singlet ground state of each  $\text{Pr}^{3+}$  ion, a state quite common for  $\text{Pr}^{3+}$  ions, for instance, in hexagonal or cubic environment [\*1]. Consequently, at low temperatures the magnetic susceptibility of the Pr-Cu complex is predominantly determined by  $\text{Cu}^{2+}$  ions, while at higher temperatures the contribution from excited levels of the  $\text{Pr}^{3+}$  ion multiplet is added.

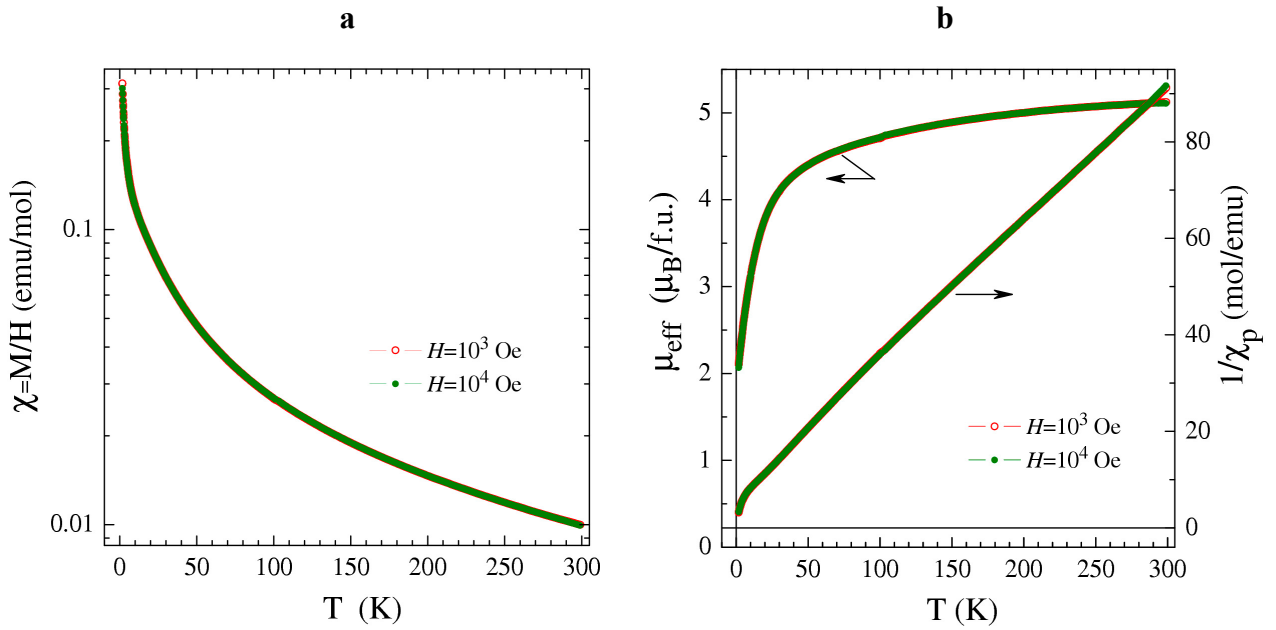

**Figure S7:** (a) Temperature dependence of the magnetic susceptibility  $\chi$  measured for the Pr-Cu complex at the magnetic fields  $H = 1; 10$  kOe. (b) Temperature dependences of  $\mu_{\text{eff}}$  and  $1/\chi_p$ . The depicted effective moment  $\mu_{\text{eff}}$  is calculated for the case of non-interacting magnetic moments ( $\theta = 0$ ).

### Sm-Cu complex (3)

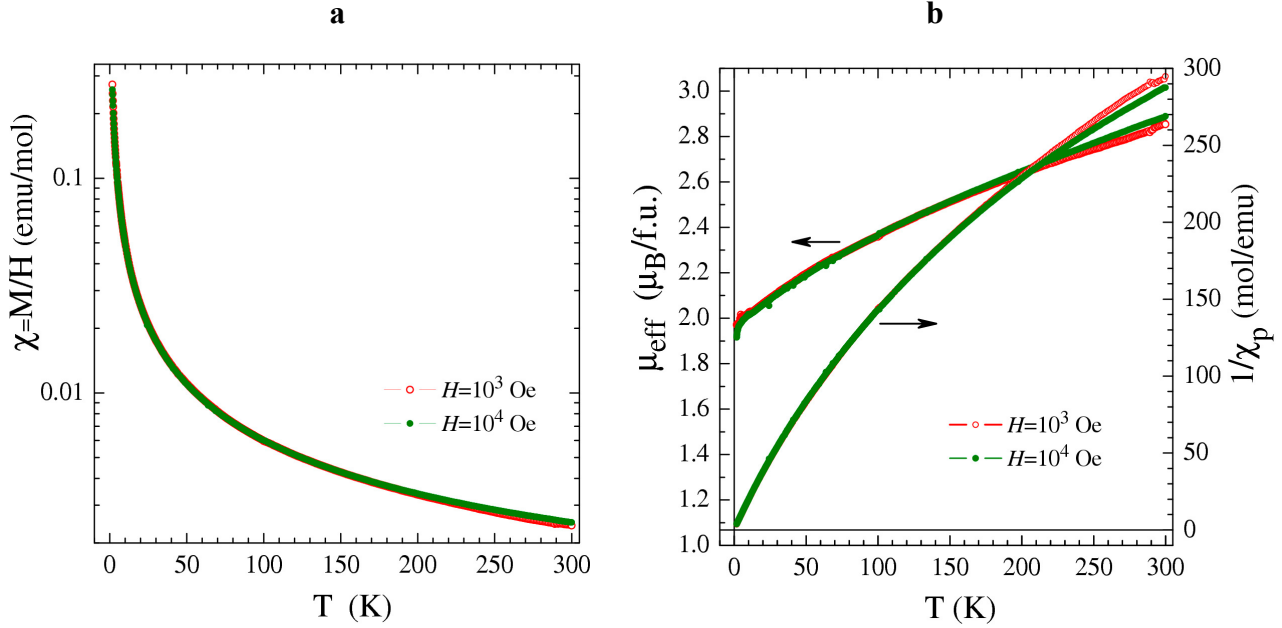

**Figure S8:** (a) Temperature dependence of the magnetic susceptibility  $\chi$  measured for the Sm-Cu complex at the magnetic fields  $H = 1; 10$  kOe. (b) Temperature dependences of  $\mu_{\text{eff}}$  and  $1/\chi_p$ . The depicted effective moment  $\mu_{\text{eff}}$  is calculated for the case of non-interacting magnetic moments ( $\theta = 0$ ).

The Sm-Cu complex demonstrates paramagnetic behavior throughout the available temperature range (Figure S8a) without any noticeable sign of inter-ion interactions. The latter is confirmed by the fact that the  $1/\chi_p$  curve goes exactly to the origin and the  $\mu_{\text{eff}}(T)$  dependence does not exhibit any singularity upon approaching  $T = 0$  (Figure S8b). The effective moment calculated for the case of non-interacting ions ( $\theta = 0$ ) reaches  $\mu_{\text{eff}} \approx 2.87 \mu_B$  at room temperature (Figure S8b), which agrees well with the values observed usually for samarium  $\text{Sm}^{3+}$  ions,  $\mu_{\text{eff}}(\text{Sm}) \approx 1.5 \mu_B$ , and copper  $\text{Cu}^{2+}$ ,  $\mu_{\text{eff}}(\text{Cu}) \approx 2 \mu_B$ :  $\mu_{\text{eff}} \approx \sqrt{2 \cdot 1.5^2 + 2^2} \approx 2.92 \mu_B$ . As the temperature decreases,  $\mu_{\text{eff}}$  decreases smoothly from  $\sim 2.87 \mu_B$  down to  $\sim 2.0 \mu_B$  at  $T = 1.77$  K. Most likely, the effective-moment reduction originates from the transition of  $\text{Sm}^{3+}$  ions to the doublet  $\pm 1/2$  ground state which is weakly magnetic due to the small  $g$  factor. Consequently, the magnetic susceptibility of the Sm-Cu complex at low temperature is determined mainly by the contribution of  $\text{Cu}^{2+}$  ions with a small addition from  $\text{Sm}^{3+}$  ones, while at higher temperatures excited doublets of the  $\text{Sm}^{3+}$  ground-state multiplet  $J = 5/2$  as well as levels of other multiplets come into play resulting in the increase of the  $\text{Sm}^{3+}$  contribution [\*1].

### La-Co complex (5)

The La-Co complex exhibits paramagnetic behavior throughout the available temperature range without any magnetic phase transition or manifestation of inter-ion interactions (Figure S9a). The absence of significant inter-ion interactions is confirmed by the  $1/\chi_p$  curve tending to zero at  $T \approx 0$  and the  $\mu_{\text{eff}}(T)$  dependence approaching zero temperature without singularity (Figure S9b). The effective magnetic moment measured in the field  $H = 1$  kOe varies from  $\mu_{\text{eff}} \approx 4.73 \mu_B$  at room temperature to  $\mu_{\text{eff}} \approx 3.8 \mu_B$  at  $T = 1.77$  K. Both high- and low-temperature  $\mu_{\text{eff}}$  values are typical of  $\text{Co}^{2+}$  ( $S = 3/2$ ) complexes. At high temperature,  $\mu_{\text{eff}}$  significantly exceeds the theoretical spin-only value of  $3.87 \mu_B$  due to the contribution of orbital moments. At low temperature, the effective magnetic momentum decreases both due to the reduction of the orbital-moment contribution and as a result of zero-field splitting of the  $\text{Co}^{2+}$  multiplet by the crystal field [\*2]. It should be noted that the sharp drop in  $\mu_{\text{eff}}$  measured in the field  $H = 10$  kOe seen at low temperatures is not a manifestation of exchange interactions but is caused by the nonlinearity of the magnetization  $M(H)$  curve, typical for  $\text{Co}^{2+}$  ions ( $S = 3/2$ ) (Figure S9c). Thus, from the point of view of magnetic properties the La-Co complex can be considered as a set of almost non-interacting  $\text{Co}^{2+}$  ions ( $S = 3/2$ ).

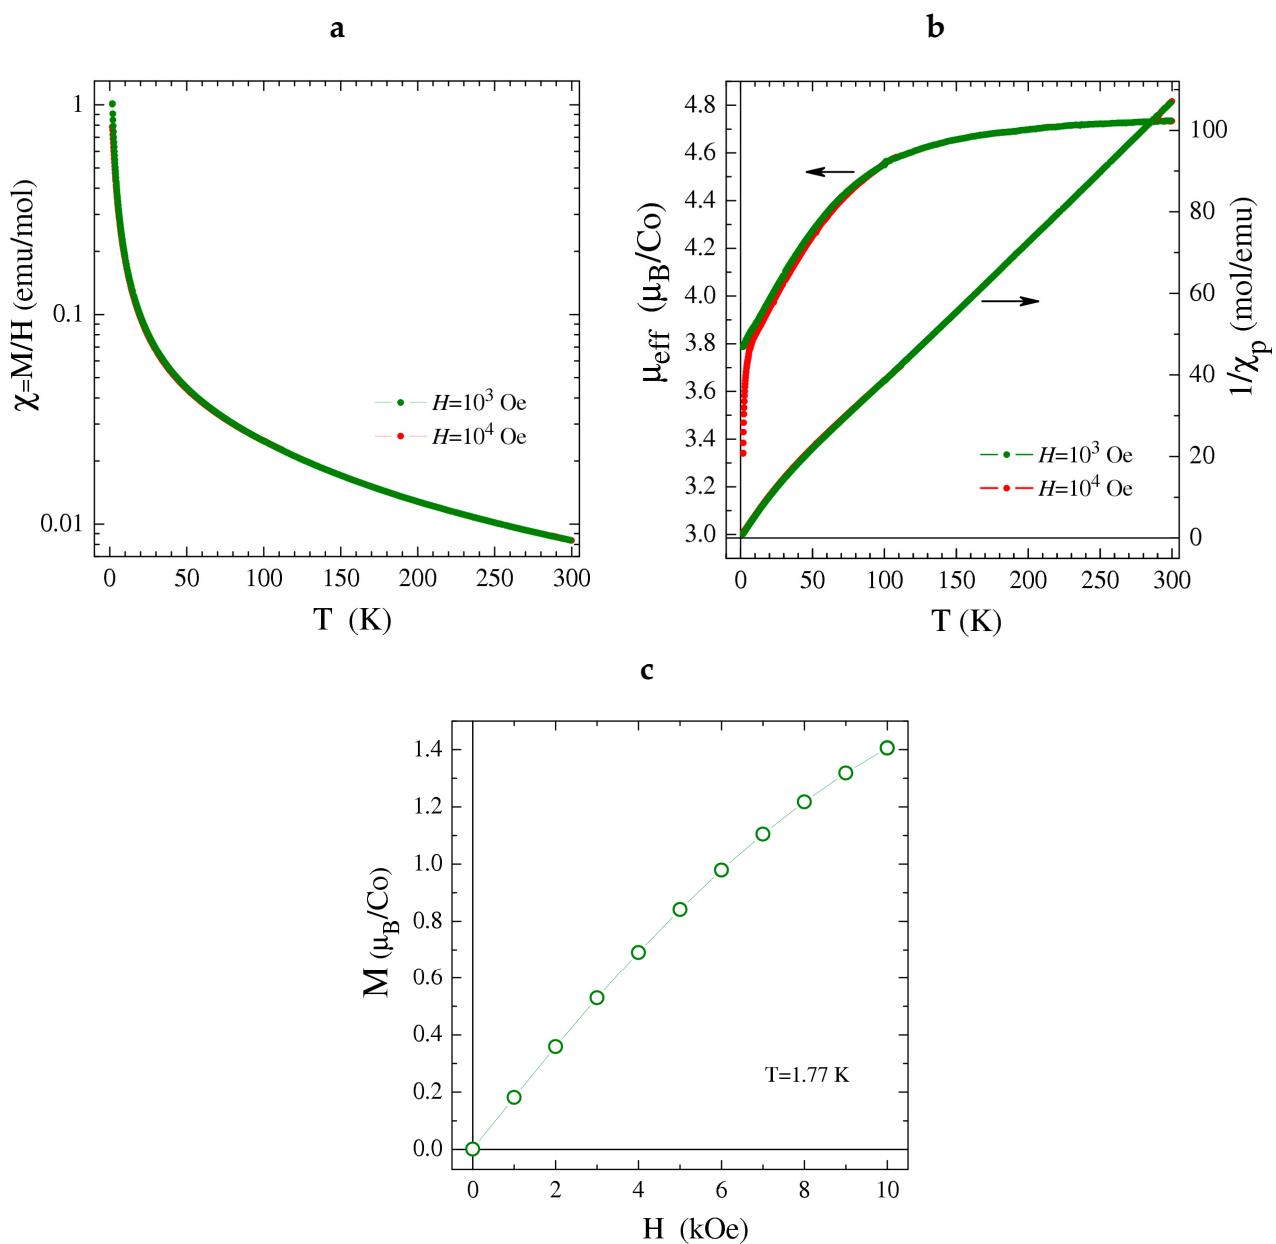

**Figure S9:** (a) Temperature dependence of the magnetic susceptibility  $\chi$  measured for the La-Co complex at the magnetic fields  $H = 1$ ; 10 kOe. (b) Temperature dependences of  $\mu_{\text{eff}}$  and  $1/\chi_p$ . The depicted effective moment  $\mu_{\text{eff}}$  is calculated for the case of non-interacting magnetic moments ( $\theta = 0$ ). (c) Magnetic field dependence of the magnetization measured at  $T = 1.77$  K.

## La-Ni complex (6)

The La-Ni complex exhibits paramagnetic behavior throughout the available temperature range (Figure S10), but at the lowest temperatures the paramagnetic susceptibility growth slows noticeably, indicating a transition to a weakly magnetic state. The calculated effective magnetic moment decreases smoothly from  $\mu_{\text{eff}} \approx 3.15 \mu_B$  at room temperature down to  $\mu_{\text{eff}} \approx 1.1 \mu_B$  at  $T = 50$  K. The high-temperature value of  $\mu_{\text{eff}}$  is close to the theoretical spin-only value of  $2.83 \mu_B$  for  $\text{Ni}^{2+}$  ( $S = 1$ ); the slight excess is due to the contribution of orbital moments. The smooth decrease of the effective moment upon cooling is associated with the transition of  $\text{Ni}^{2+}$  ions into the weakly magnetic (singlet) ground state as a result of zero-field splitting of the  $S = 1$  multiplet [\*2] or formation of the low-spin  $S = 0$  state.

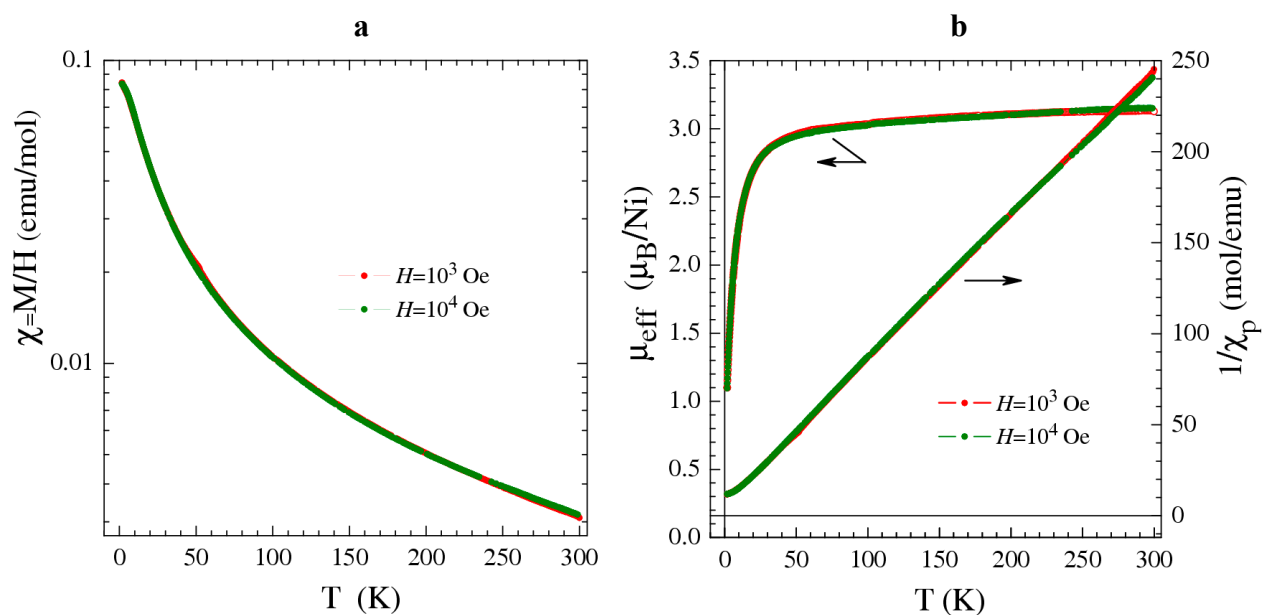

**Figure S10:** (a) Temperature dependence of the magnetic susceptibility  $\chi$  measured for the La-Ni complex at the magnetic fields  $H = 1; 10$  kOe. (b) Temperature dependences of  $\mu_{\text{eff}}$  and  $1/\chi_p$ . The depicted effective moment  $\mu_{\text{eff}}$  is calculated for the case of non-interacting magnetic moments ( $\theta = 0$ ).

[\*1] A. K. Zvezdin, V. M. Matveev, A. A. Mukhin, and A. I. Popov, *Rare Earth Ions in Magnetically Ordered Crystals* (Nauka, Moscow, 1985).

[\*2] R. Boča, *Coord. Chem. Rev.* **248**, 757 (2004).
